# Supplementary material for: Predictors of Plasmodium falciparum Malaria Incidence in Chano Mille, South Ethiopia: A Longitudinal Study
Source: PubMed Central journal article supplement (PMC3435347; doi:10.4269/ajtmh.2012.12-0155), 2012-09-05
Supplement: SD1.pdf [file SD1.pdf]

## CONSTRUCTION OF WEALTH INDEX

Principal component analysis (PCA) was carried out using 15 variables. Eleven of the variables were binary and the other four variables were dichotomized into meaningful categories (some of the original categories had very few frequencies (Table SF1). Other socio-economic variables were also analyzed but did result in smaller Eigen values. The total variance explained by the first principal component and the

corresponding Eigen value was 20.35% and 3.05, respectively. The inclusion of education of the household head in the PCA reduced the total variance explained by 1%, so we opted not to consider it in the wealth index construction rather to use it separately in further analysis. It is also known that the majority of the household heads depend on farming to generate income rather than being used on the merits of their educational status. Table SF2 shows frequencies, communalities, and correlations.

SUPPLEMENTARY TABLE SF1  
Variables and assigned values

| S. no. | Variables                             | Assigned values                                                    |
|--------|---------------------------------------|--------------------------------------------------------------------|
| 1      | Electricity                           | Present = 1, Absent = 0                                            |
| 2      | Watch                                 | Present = 1, Absent = 0                                            |
| 3      | Radio                                 | Present = 1, Absent = 0                                            |
| 4      | TV                                    | Present = 1, Absent = 0                                            |
| 5      | Mobile                                | Present = 1, Absent = 0                                            |
| 6      | Refrigerator                          | Present = 1, Absent = 0                                            |
| 7      | Separate room used for kitchen        | Present = 1, Absent = 0                                            |
| 8      | Bicycle                               | Present = 1, Absent = 0                                            |
| 9      | Any land used for agriculture         | Present = 1, Absent = 0                                            |
| 10     | Livestock                             | Present = 1, Absent = 0                                            |
| 11     | Account in bank or credit association | Present = 1, Absent = 0                                            |
| 12     | Main material of the floor            | Cement/ceramic tiles = 1* Earth or dung = 0                        |
| 13     | Main material of the roof             | Corrugated iron or cement/concrete = 1† Thatch or leaf = 0         |
| 14     | Main material of the wall             | Wood with mud/wood with mud and cement = 1‡ No wall§/only wood = 0 |
| 15     | Latrine facility                      | Pit latrine¶ = 1, No latrine = 0                                   |

\*Ceramic tile floor: 2 households.

†Cement/concrete roof: 2 households.

‡Wood with mud and cement: 3 households.

§No wall: 2 households.

¶No other specific types reported.

SUPPLEMENTARY TABLE SF2

Frequencies of the binary/dichotomized variables, communalities, and correlations with the first component

| Variable (N = 1388)                   | Present or favorable |         | Communalities* | Correlations with the first component† |
|---------------------------------------|----------------------|---------|----------------|----------------------------------------|
|                                       | Frequency            | Percent |                |                                        |
| Electricity                           | 1,166                | 84.0    | 0.539          | 0.602                                  |
| Watch                                 | 722                  | 52.0    | 0.384          | 0.579                                  |
| Radio                                 | 873                  | 62.9    | 0.496          | 0.644                                  |
| TV                                    | 196                  | 14.1    | 0.555          | 0.609                                  |
| Mobile                                | 223                  | 16.1    | 0.457          | 0.497                                  |
| Refrigerator                          | 15                   | 1.1     | 0.357          | 0.245                                  |
| Separate room used for kitchen        | 767                  | 55.3    | 0.393          | 0.374                                  |
| Bicycle                               | 255                  | 18.4    | 0.369          | 0.538                                  |
| Any land used for agriculture         | 743                  | 53.5    | 0.606          | 0.396                                  |
| Livestock                             | 800                  | 57.6    | 0.576          | 0.417                                  |
| Account in bank or credit association | 127                  | 9.1     | 0.568          | 0.180                                  |
| Main material of the floor            | 67                   | 4.8     | 0.322          | 0.353                                  |
| Main material of the roof             | 913                  | 65.8    | 0.341          | 0.541                                  |
| Main material of the wall             | 1,354                | 97.6    | 0.236          | 0.185                                  |
| Latrine facility                      | 1,358                | 97.8    | 0.439          | 0.134                                  |

\*Estimates of the variance in each variable accounted for by the components (4 components were extracted but we took the first component for further analysis).

†Radio was the most representative (of the first component) and followed by TV, electricity, watch, main material of the roof... and latrine facility was the least. The absence of negative values confirms that all variables were positively correlated with wealth (as expected).
